# Supplementary material for: Synthesis of mint leaf extract and mint-leaf-based NiO nanoparticles, coating of extract layers without and with NiO nanoparticles on copper through drop-casting, and their analysis for the corrosion prevention in saline water
Source: Royal Society of Chemistry journal article supplement (doi:10.1039/d3nj03466f), 2023-01-01
Supplement: d3nj03466f1.pdf [file d3nj03466f1.pdf]

## Supporting Information

### Synthesis of mint leaf extract and mint leaf based NiO nanoparticles, coating of extract's layers without and with NiO nanoparticles on copper through drop casting, and their analysis for the corrosion prevention in saline water

Shivam Rai, Gopal Ji\*

Centre for Advanced Studies, Lucknow-226031, U.P., India

\*Corresponding author details: gopal.ji.ji@gmail.com, gopalji@cas.res.in, +91-9628890414

### Supporting Information

**Figure SI1.** Schematic illustration for the preparation of the NiO NPs using water extract of mint leaves (AEML).

**Figure SI2.** (a) Cyclic Voltammograms for bare Cu, 1 L CEML coated Cu and 2L CEML coated Cu, and (b) zoom view.

**Figure SI3.** OCP curves for Cu coated with different layer of (a) CEML+NiO NP<sub>5mg</sub> and (b) CEML+NiO NP<sub>5mg</sub> in 0.5 M NaCl.

**Figure SI4.** Tafel polarization curves for Cu coated with different layer of (a) CEML+NiO NP<sub>5mg</sub> and (b) CEML+NiO NP<sub>15mg</sub> in 0.5 M NaCl.

**Figure SI5.** Nyquist and Bode phase angle curves for Cu coated with different layer of (a, c) CEML+NiO NP<sub>5mg</sub> and (b, d) CEML+NiO NP<sub>15mg</sub> in 0.5 M NaCl.

**Figure SI6.** FESEM images of and corroded (a) Cu, (b) CEML coated Cu, and (c) 1 L (CEML+ NiONPs<sub>15 mg</sub>) coated Cu at 10 k magnification.

**Table SI1.** Efficiencies with standard deviation based on  $I_{\text{corr}}$  and  $R_{\text{ct}}$  obtained in 0.5 M NaCl for Cu+ 2L, CEML Cu+ 2L (CEML+ NiO<sub>5mg</sub>), and Cu+ 1L (CEML+ NiO<sub>15mg</sub>).

## Supporting Information

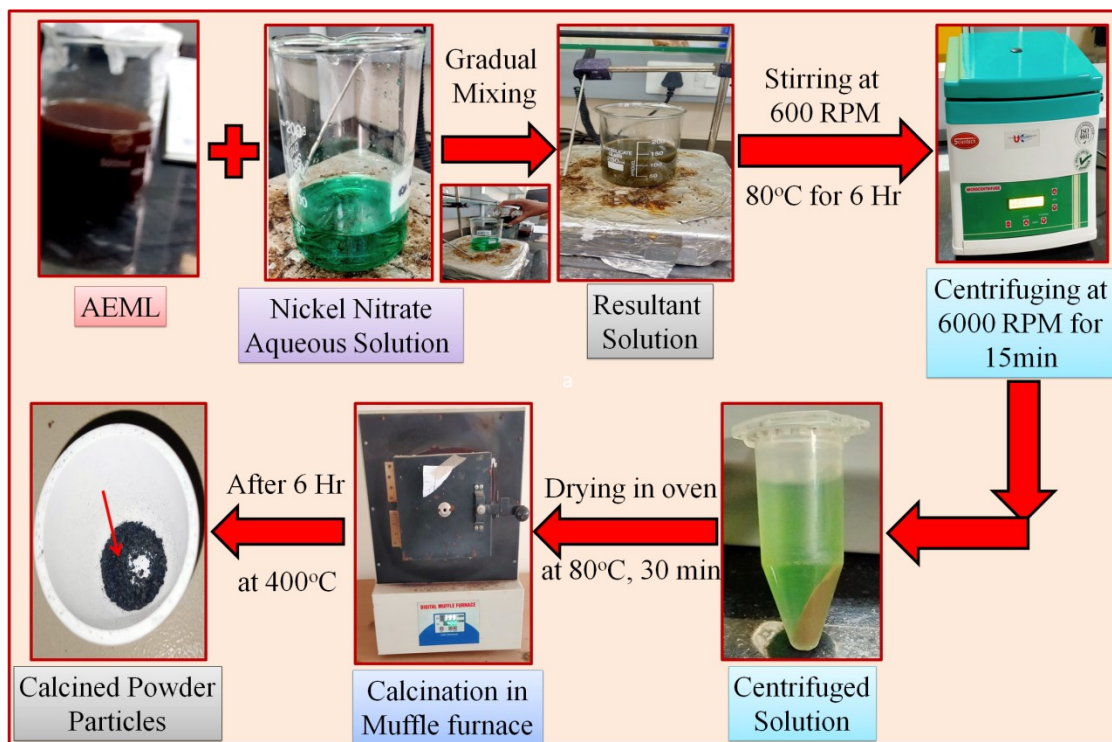

**Figure SI1**

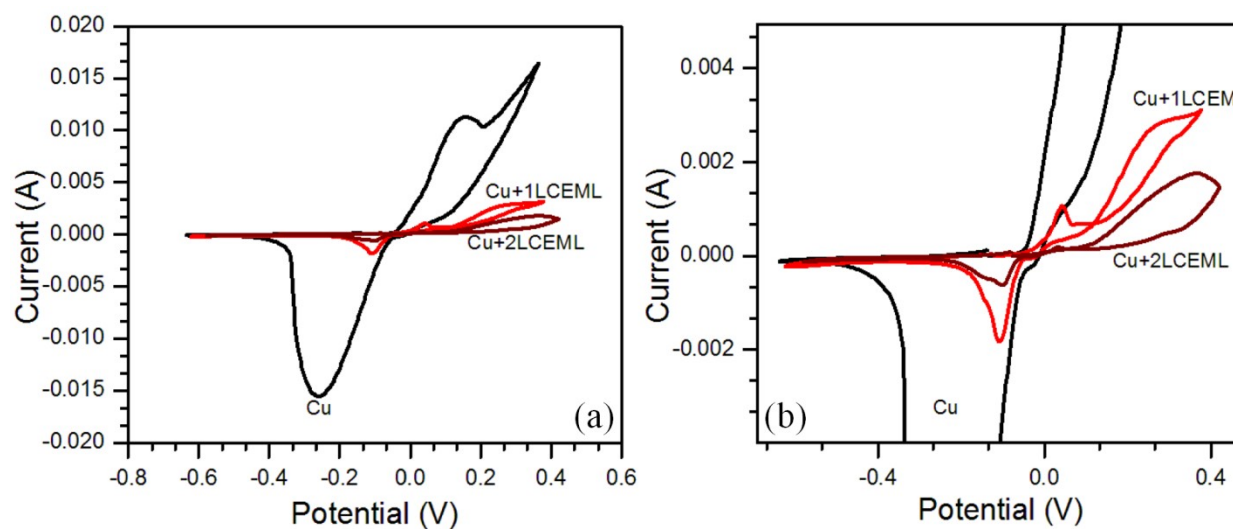

**Figure SI2**

## Supporting Information

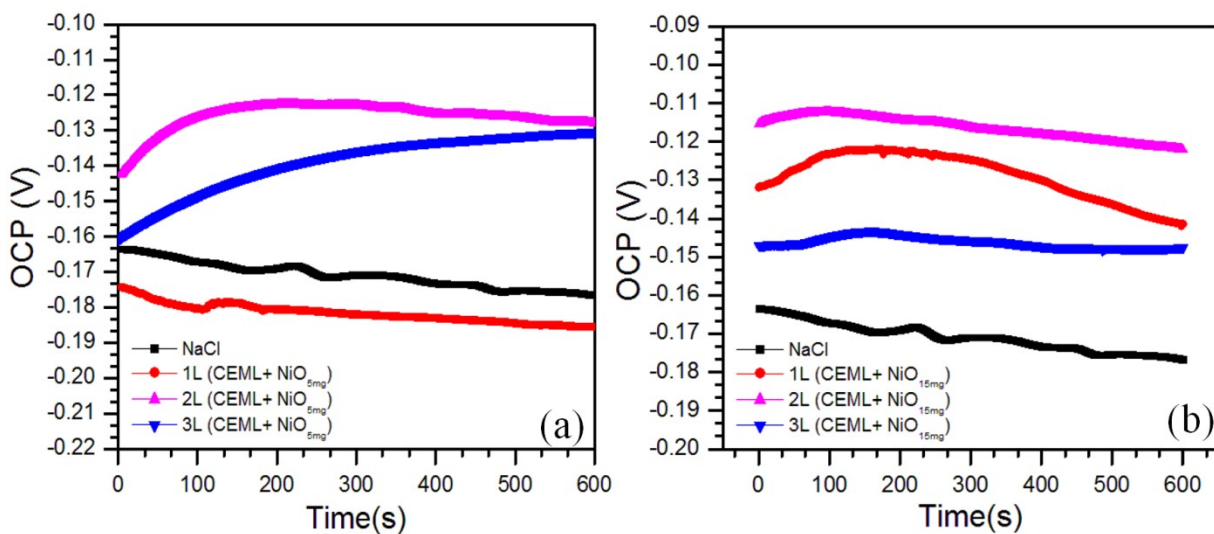

**Figure SI3**

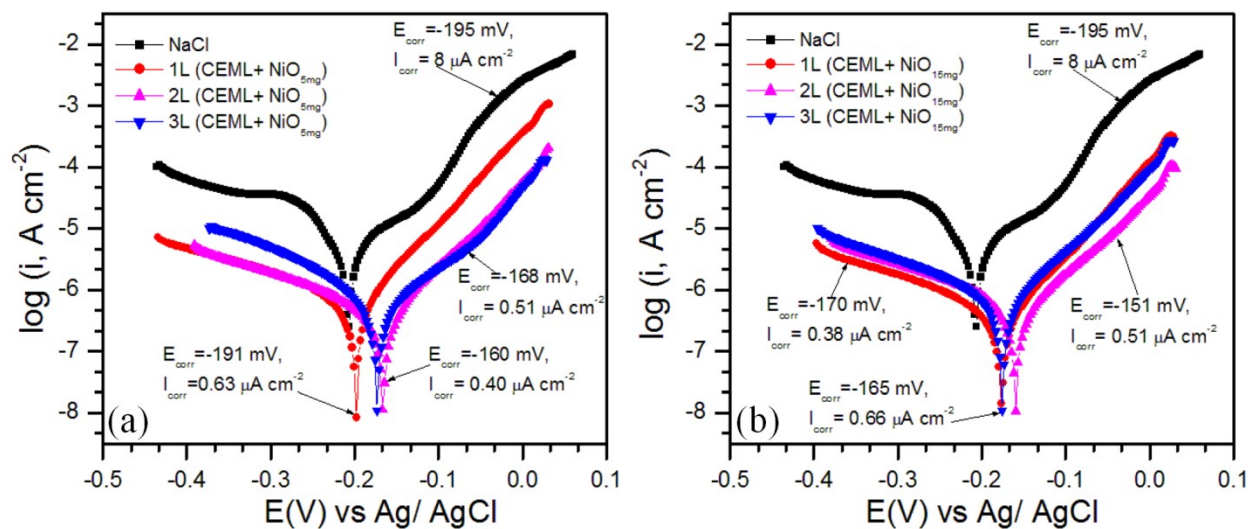

**Figure SI4**

# Supporting Information

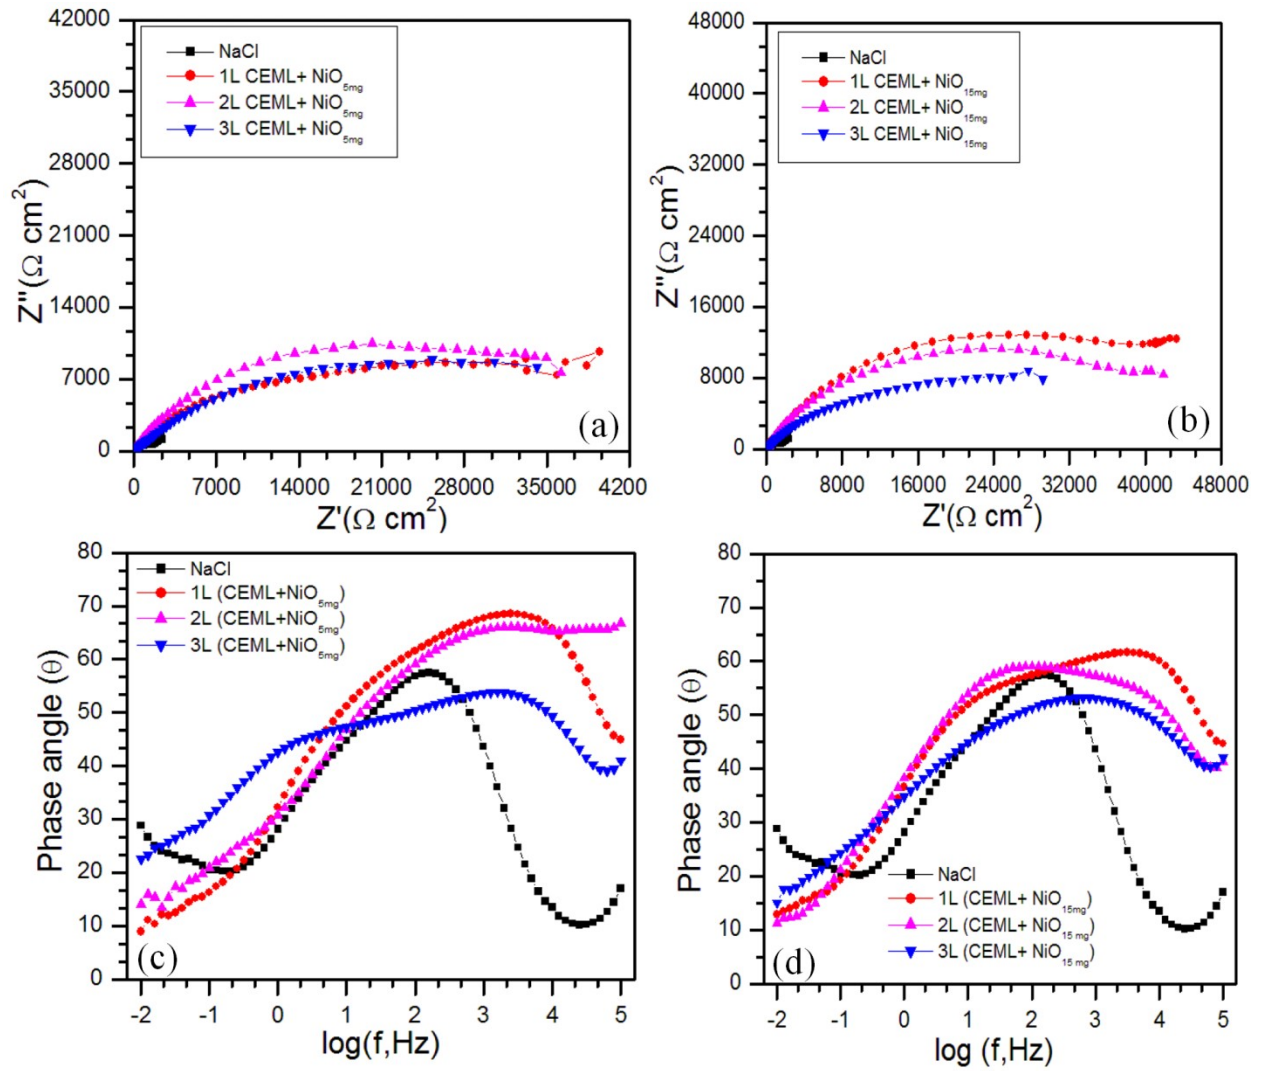

**Figure S15**

## Supporting Information

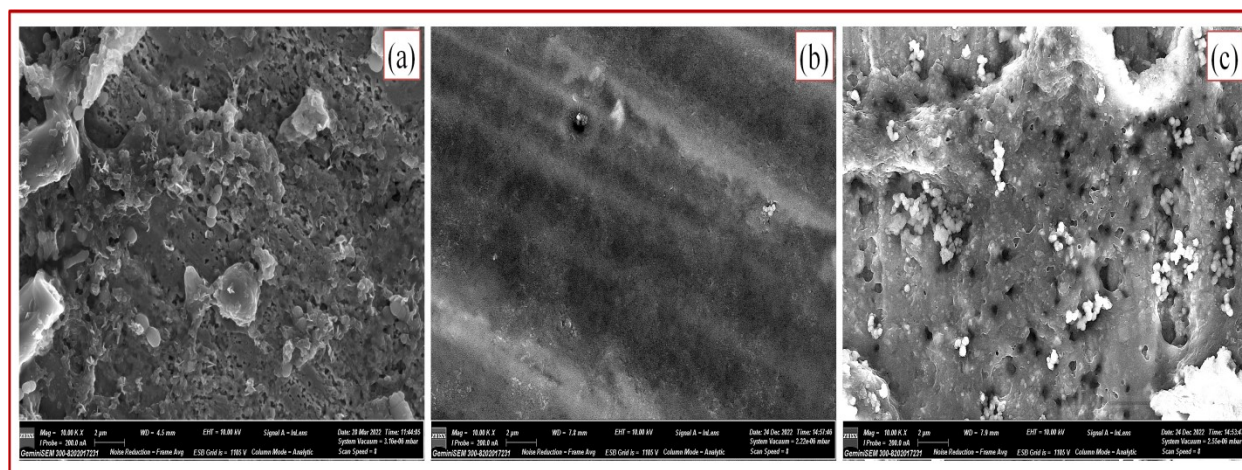

**Figure SI6**

**Table SI1**

| Investigated System     | % $\mu_T$    | % $\mu_{Rct}$ |
|-------------------------|--------------|---------------|
| Cu+ 2L CEML             | 88 $\pm$ 2   | 87 $\pm$ 1.5  |
| Cu+ 2L (CEML+ NiO 5mg)  | 94 $\pm$ 1.5 | 93 $\pm$ 1    |
| Cu+ 1L (CEML+ NiO 15mg) | 96 $\pm$ 0.5 | 97 $\pm$ 0.5  |
